# Supplementary material
Source: publisher figshare collection journal article supplement (https://frontiersin.figshare.com/ndownloader/files/21845202)
Supplement: Supplementary file 1 [file 21845202]

## Appendix A. Examples of Simulated Target and Distractor Posts

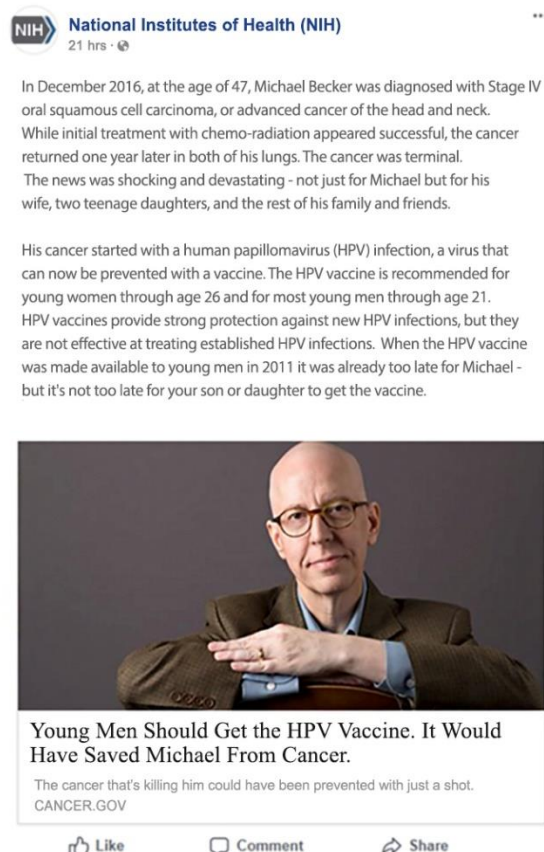

**Figure a. Example of target stimuli: evidence-based information, government organization source, and narrative**

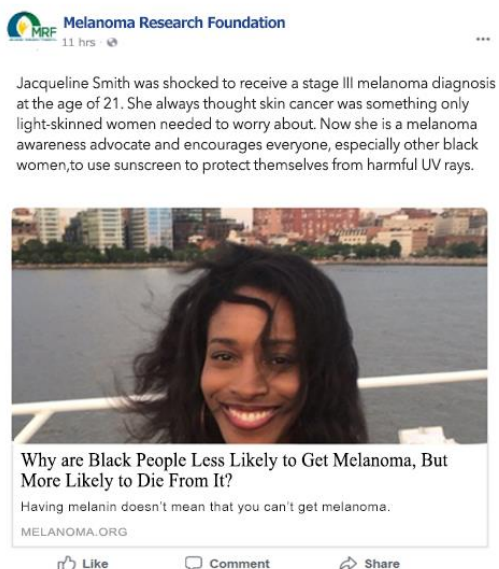

**Figure c. Example of target stimuli: evidence-based information, health organization source, and non-narrative**

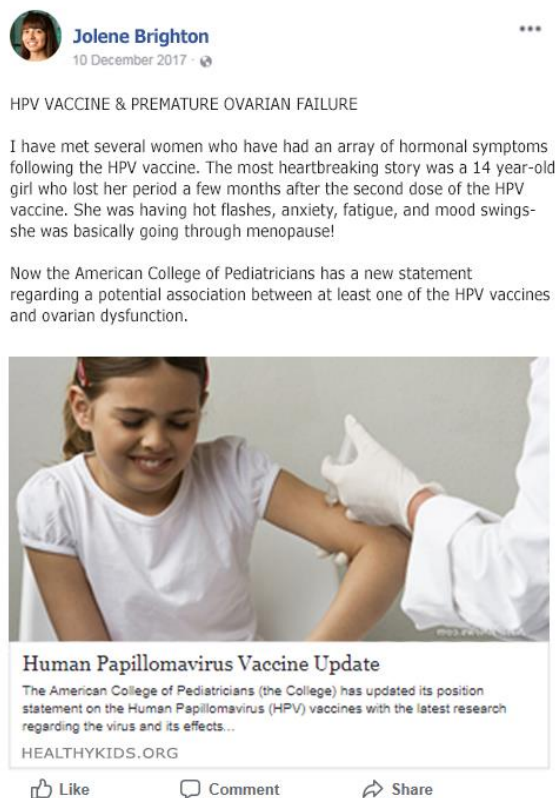

**Figure b. Example of target stimuli: non-evidence-based information, a lay individual source, and narrative**

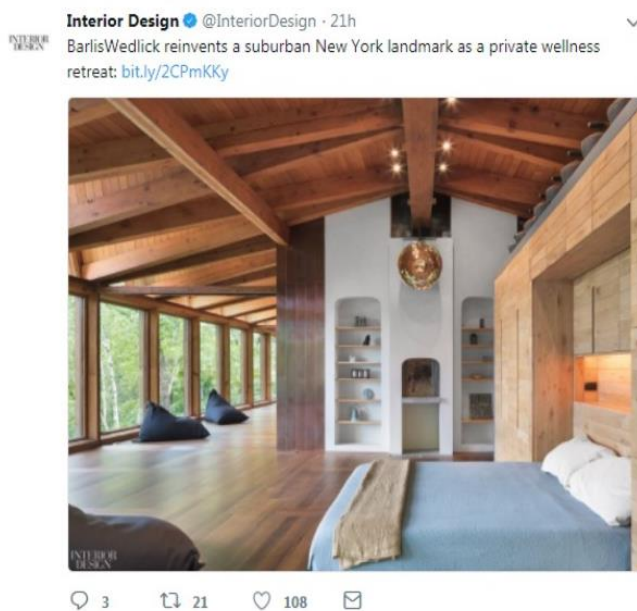

**Figure d. Example of a distractor post**
